# Supplementary material
Source: Research Square preprint supplement (doi:10.21203/rs.3.rs-9569973/v1)
Supplement: Supplementary file 1 [file 0677a7e3ff15919865e89387.docx]

***Systematic evidence-mapping of climate change adaptation challenges in urban water systems***

**
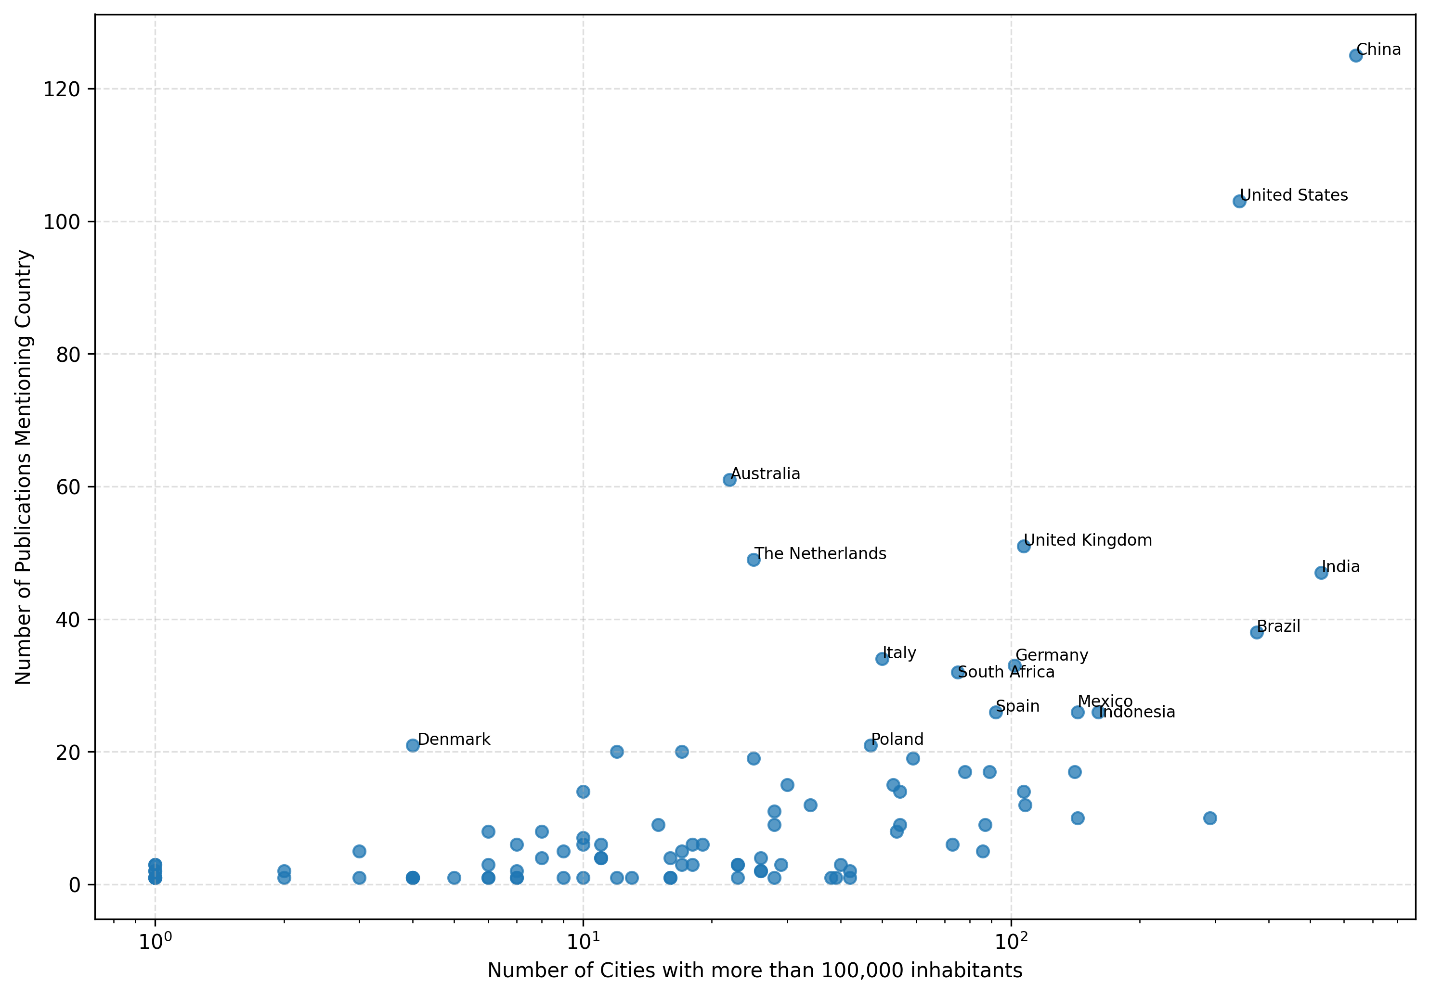
**

**Fig. SX1.** Frequency of number of cities with over 100k population per country mentioned in publication

**
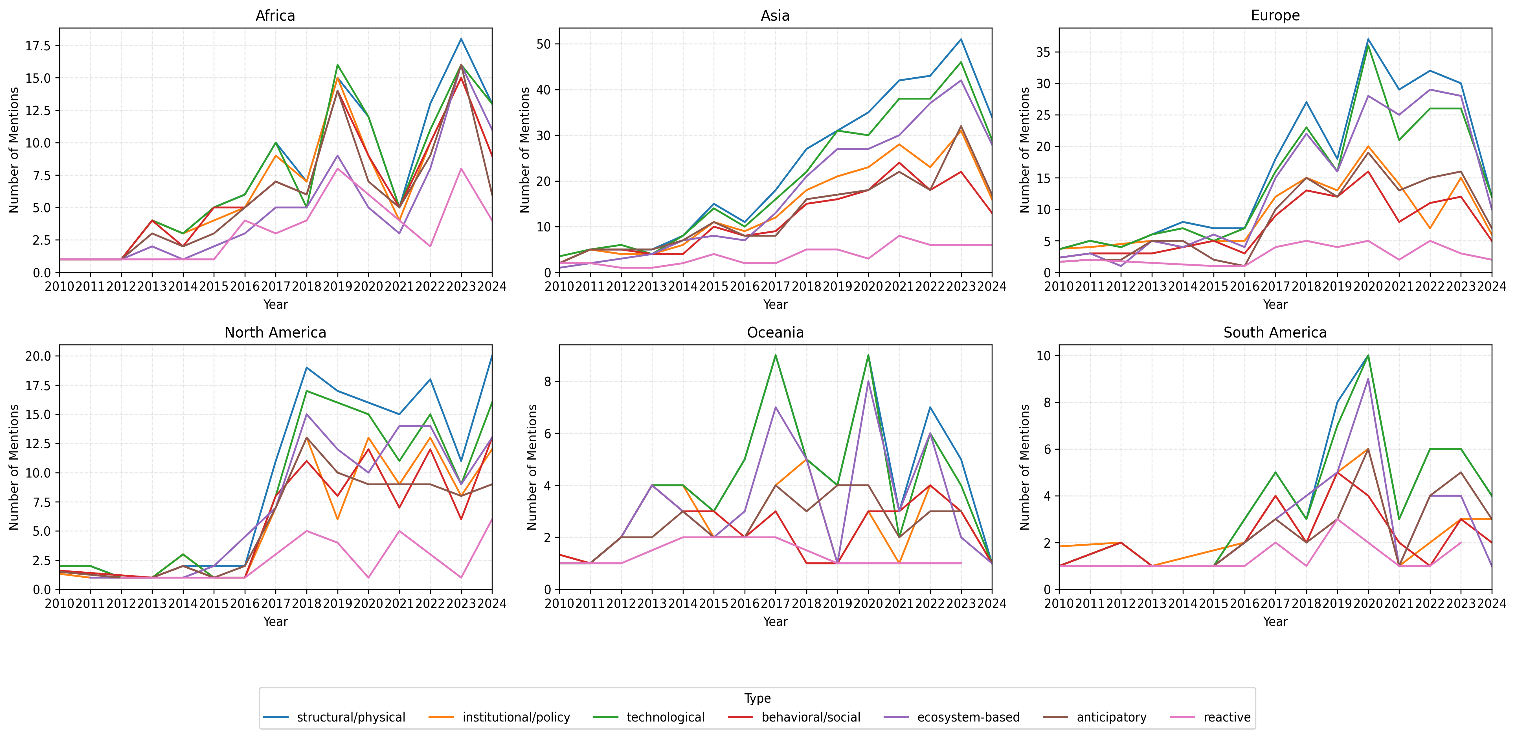
**

**Fig. SX2.** Temporal evolution of CCA measure categories mentioned in the scientific literature per continent

**
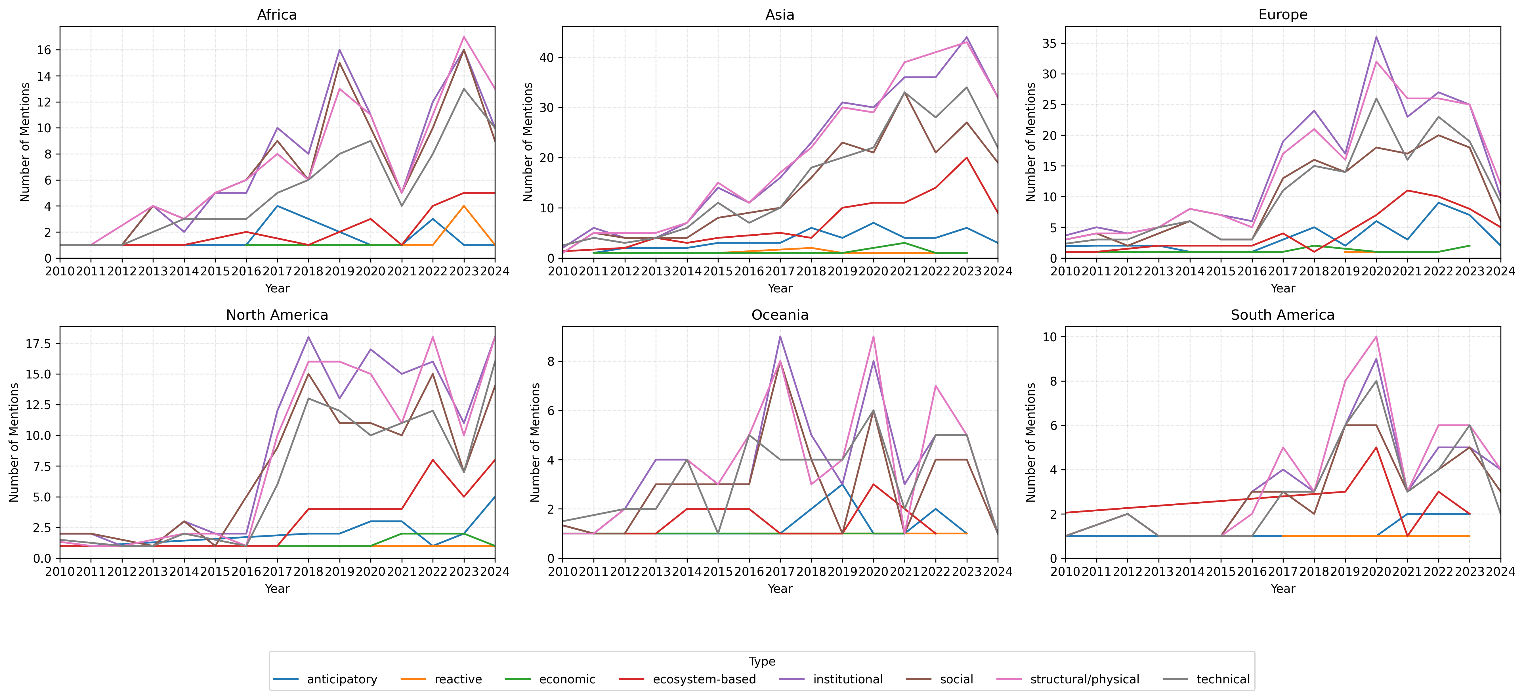
**

**Fig. SX3.** Temporal evolution of CCA measure categories mentioned in the scientific literature per continent

**
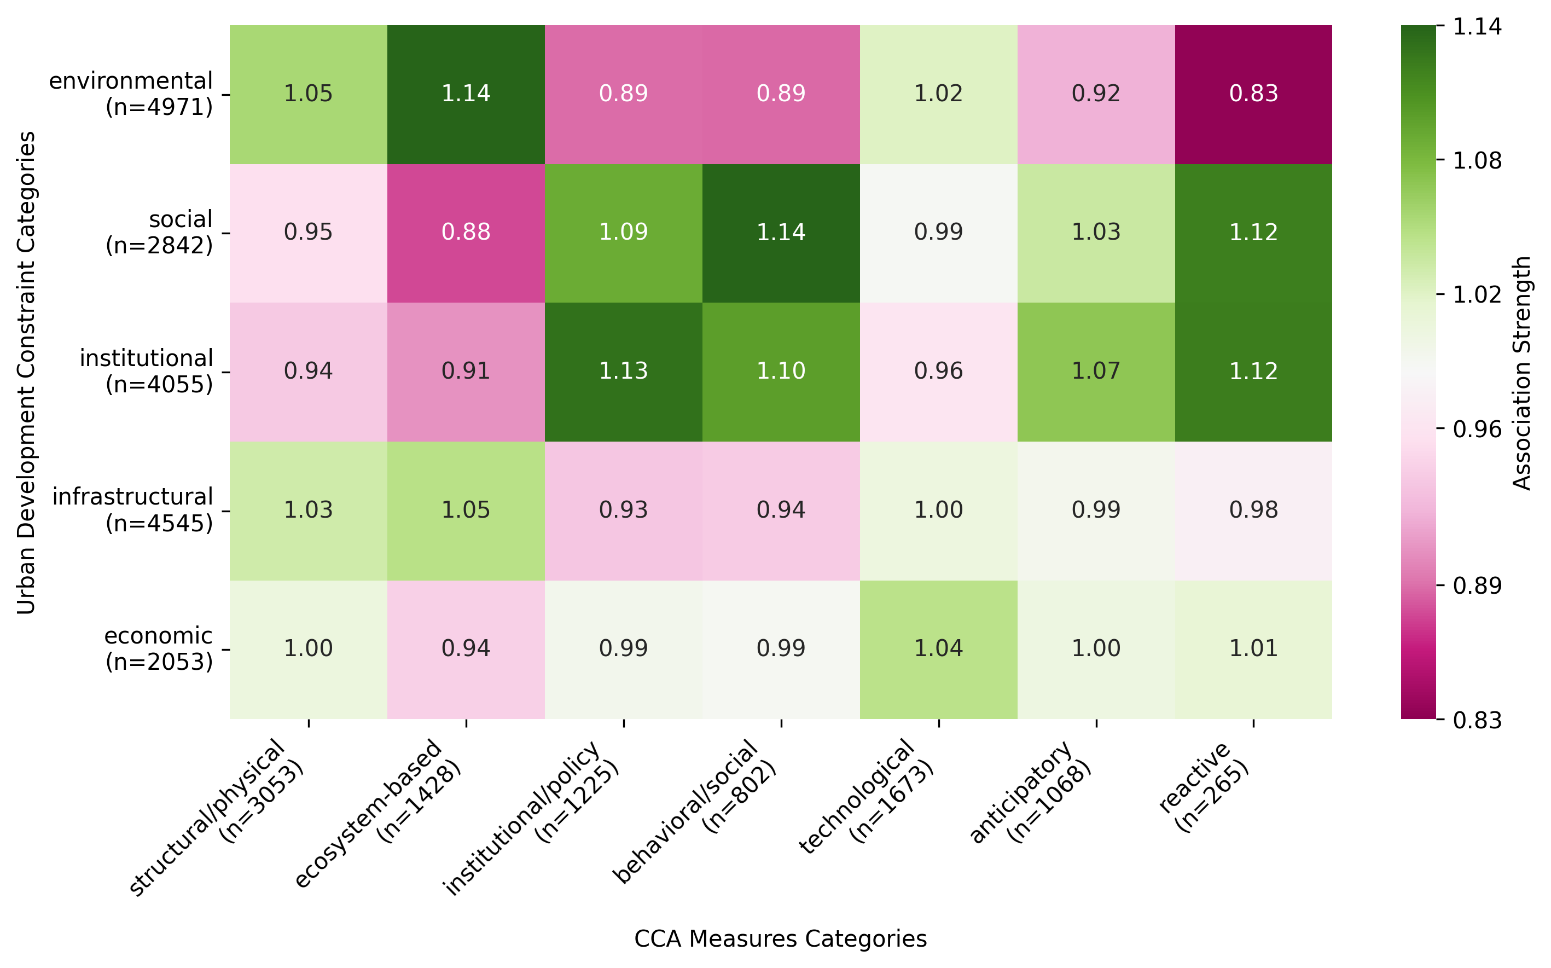
**

**Fig. SX4.** Heat map showing association strength between urban development constraint categories and CCA measure categories

**
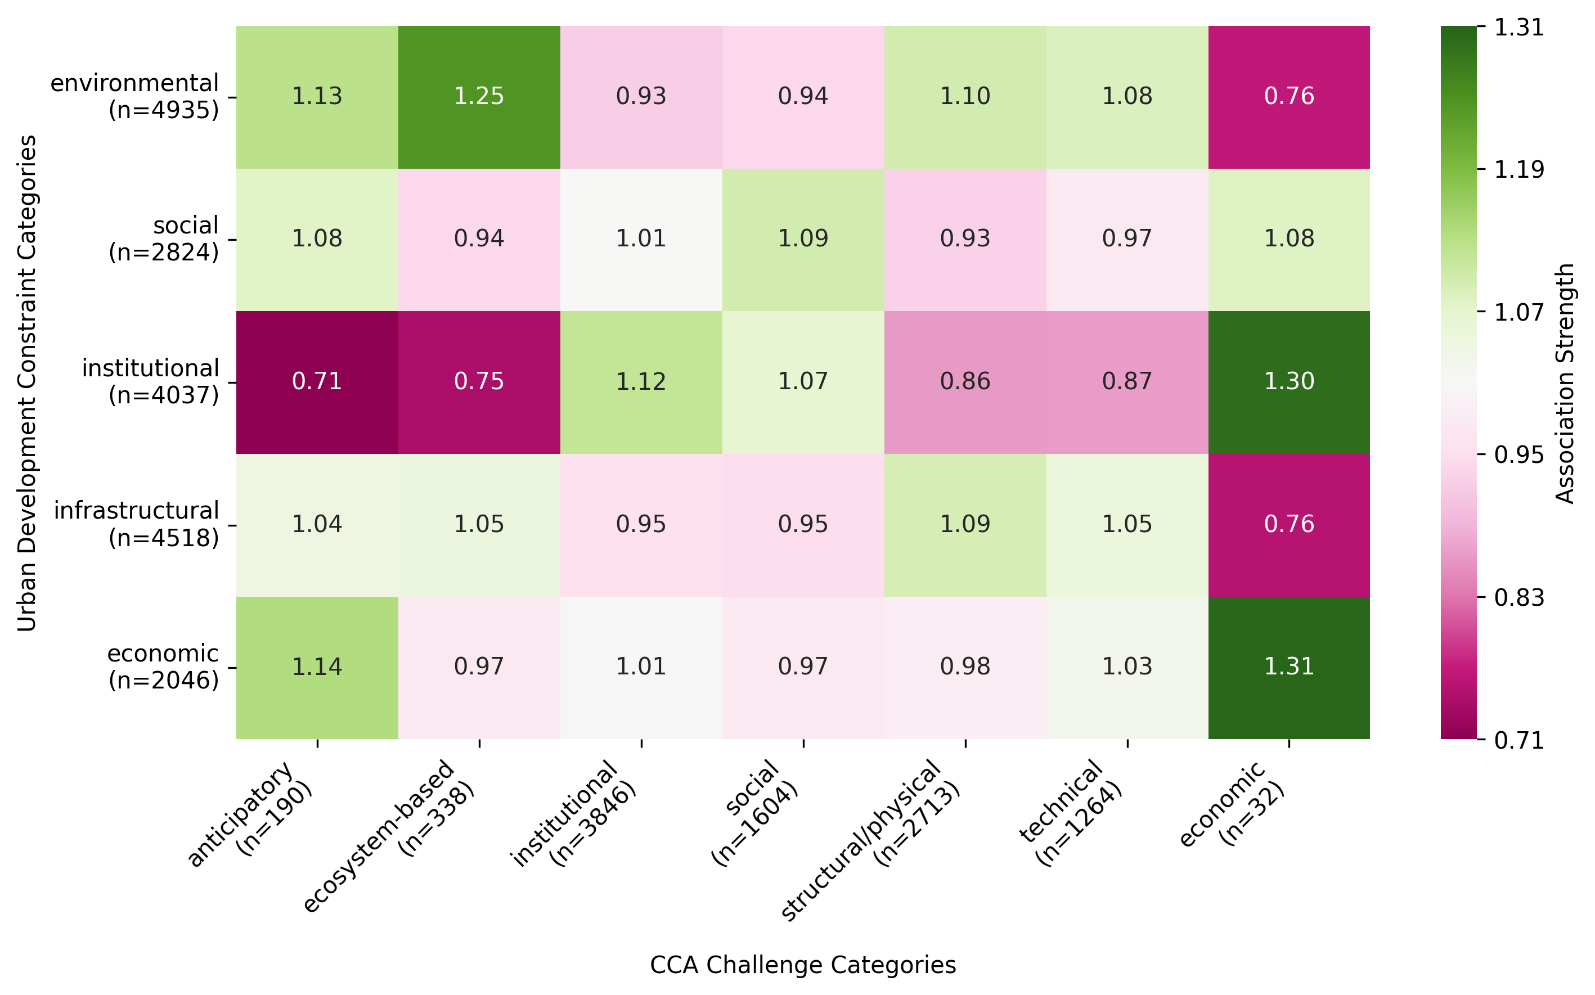
**

**Fig. SX5.** Heat map showing association strength between urban development constraints and CCA challenges
