# Supplementary material
Source: Research Square preprint supplement (doi:10.21203/rs.3.rs-9569973/v1)
Supplement: Supplementary file 2 [file 35668fb484e40978f23b5de2.pdf]

# How to review? A Recipe for the online-Excel sheet

## 1. Get access to the article (via DOI and your university access):

If you have access: Download the PDF. Add your name in the online-Excel column „Reviewer(s)“  
→ **continue**

If you have no access, note that in the online-Excel column „Access“ → **finished** (other reviewers might try to get access)

| doi                  | url                                                                                             |
|----------------------|-------------------------------------------------------------------------------------------------|
| 10.5334/bc.377       | <a href="https://www.scopus.com/inward/record.uri">https://www.scopus.com/inward/record.uri</a> |
| 10.2166/wcc.2023.233 | <a href="https://www.scopus.com/inward/record.uri">https://www.scopus.com/inward/record.uri</a> |

  

| Reviewer(s) |
|-------------|
| Feline      |

| Access | Column 1 |
|--------|----------|
|        |          |

Yes

No

## 2. Check the publication type of the article:

Is it a peer-reviewed journal article? → **read**

If not (e.g. a conference abstract): note that in the online-Excel column „Anomaly“ → **finished**

| Anomaly | Column 1 |
|---------|----------|
| Maybe   |          |

Yes

No

Maybe

Wrong publication type

does not address research question

## How to review? A Recipe for the [online-Excel](#) sheet

### 3. Read the full text: Does it address our research question (slide 2!)?

*We only screened the abstract. Hence, it might be that unsuitable papers are still in there, which can be directly excluded, e.g. due to the following reasons: not urban, not water-related, no adaptation*

Addresses research question → **read further**

Does not address research question: note that in the online-Excel column „Anomaly“ → **finished**



The screenshot shows a dropdown menu for the 'Anomaly' column. The menu options are 'Yes', 'No', and 'Maybe'. The 'Maybe' option is selected, and a tooltip is visible with the text 'Wrong publication type' and 'does not address research question'.

### 4. Read the full text: Fill remaining columns of the online-Excel document

- Blue columns:** Choose one of a selection of fixed categories
- Orange columns:** You may add categories (or choose existing ones)

Example screenshots  
on the next slide

→ After that you successfully conducted a full-text review including the article





| Reviewers Checklist Item        | LLM                                                                                                                                                                                                                                                                                                                                                                                                                                                                                                                                                                                                                                                                                                                                                                                                                                                                                                                                                      | Reviewer1                            | Reviewer 2                            | Reviewer 3                                | Reviewer 4                            | Reviewer 5                             | Reviewer 6                                 | Reviewer 7                        | Score |
|---------------------------------|----------------------------------------------------------------------------------------------------------------------------------------------------------------------------------------------------------------------------------------------------------------------------------------------------------------------------------------------------------------------------------------------------------------------------------------------------------------------------------------------------------------------------------------------------------------------------------------------------------------------------------------------------------------------------------------------------------------------------------------------------------------------------------------------------------------------------------------------------------------------------------------------------------------------------------------------------------|--------------------------------------|---------------------------------------|-------------------------------------------|---------------------------------------|----------------------------------------|--------------------------------------------|-----------------------------------|-------|
| Research method                 | mixed                                                                                                                                                                                                                                                                                                                                                                                                                                                                                                                                                                                                                                                                                                                                                                                                                                                                                                                                                    | Match                                | Match                                 | Match                                     | Match                                 | Match                                  | Match                                      | Match                             | 7     |
| Type of Methodology             | Participatory Approach, Shannon Entropy, Fuzzy Theory                                                                                                                                                                                                                                                                                                                                                                                                                                                                                                                                                                                                                                                                                                                                                                                                                                                                                                    | Match                                | Match                                 | No                                        | Match (LLM is specific)               | Match (LLM is specific)                | Match (LLM is specific)                    | Match (LLM missed specifics)      | 5.5   |
| Type (s) of Case Study Analysis | single-case design                                                                                                                                                                                                                                                                                                                                                                                                                                                                                                                                                                                                                                                                                                                                                                                                                                                                                                                                       | Match                                | Match                                 | Match                                     | Match                                 | Match                                  | Match                                      | Match                             | 7     |
| Geographic Location             | Brazil, South America                                                                                                                                                                                                                                                                                                                                                                                                                                                                                                                                                                                                                                                                                                                                                                                                                                                                                                                                    | Match                                | Match                                 | Match                                     | Match                                 | Match                                  | Match                                      | Match                             | 7     |
| Population                      | <1 million                                                                                                                                                                                                                                                                                                                                                                                                                                                                                                                                                                                                                                                                                                                                                                                                                                                                                                                                               | Match                                | Match                                 | Match                                     | Match                                 | Match                                  | Match                                      | Match                             | 7     |
| Natural Hazards                 | urban flooding<br>Increase of urbanization, Buildings in risk areas, Problems with the design of the drainage network, Lack of maintenance of drainage network, Interventions in the catchment, interventions on the channels, Lack of appropriate legislation to deal with floods, There are laws, but they are neglected, There are laws, but they are not implemented                                                                                                                                                                                                                                                                                                                                                                                                                                                                                                                                                                                 | Match (water scarcity missed by LLM) | Match (missed drought)                | Match                                     | Match (water scarcity missed by LLM)  | Match (water scarcity missed by LLM)   | Match (water scarcity missed by LLM)       | Match                             | 4.5   |
| Urban Problem                   | are not implemented                                                                                                                                                                                                                                                                                                                                                                                                                                                                                                                                                                                                                                                                                                                                                                                                                                                                                                                                      | Match with extra from LLM            | Match (missed water scarcity) LLM ha: | Match (LLM has more information)          | No (Reviewer doesn't answer)          | Match (LLM is specific)                | Match (LLM is specific and more informatio | Match                             | 5.5   |
| Sustainability Mentioned        | no                                                                                                                                                                                                                                                                                                                                                                                                                                                                                                                                                                                                                                                                                                                                                                                                                                                                                                                                                       | Match                                | Match                                 | Match                                     | Match                                 | Match                                  | Match                                      | Match                             | 7     |
| Climate Change Mentioned        | yes                                                                                                                                                                                                                                                                                                                                                                                                                                                                                                                                                                                                                                                                                                                                                                                                                                                                                                                                                      | Match                                | Match                                 | Match                                     | Match                                 | Match                                  | Match                                      | Match                             | 7     |
| Circularity of Water Mentioned  | no                                                                                                                                                                                                                                                                                                                                                                                                                                                                                                                                                                                                                                                                                                                                                                                                                                                                                                                                                       | Match                                | Match                                 | Match                                     | Match                                 | Match                                  | No                                         | Match                             | 6     |
| Adaptation Measures             | Structural/physical adaptation: improvement of drainage network design and maintenance, sustainable drainage systems, institutional/policy adaptation: updating and enforcing legislation, integration of urban planning and water management, stakeholder collaboration, Technological adaptation: GIS-based vulnerability mapping, pixel-by-pixel analysis, monitoring, Behavioral/social adaptation: participatory citizen science, risk communication, Anticipatory adaptation: pre-event vulnerability and exposure mapping, Reactive adaptation: coping capacity enhancement and post-flood recovery support<br>Lack of representative datasets, Data scarcity and quality issues, Complexity in selecting and weighting indicators, Stakeholder inability to quantify weight preferences, Governance and institutional constraints, Poor integration of urban planning and water management, Financial constraints, Need for regular reassessment | Match with extra from LLM            | No (reviewer misunderstanding)        | No (Impervious Surface for infiltration m | Match (LLM has more information)      | No (reviewer thinks no explicit adapta | Match (LLM is specific and descriptive)    | Match (LLM more specific and desc | 4.5   |
| Adaptation Challenges           | reassessment                                                                                                                                                                                                                                                                                                                                                                                                                                                                                                                                                                                                                                                                                                                                                                                                                                                                                                                                             | Match with extra from LLM            | Match                                 | Match (LLM has more information)          | Match (LLM has more and specific info | Match (LLM has more information)       | Match (LLM is descriptive and specific)    | Match (LLM specif and decriptive) | 7     |

**Total = 84** **75 89%**  
**38078915**

|                 |                                                                                                                                                                                                                                                                                                                               |
|-----------------|-------------------------------------------------------------------------------------------------------------------------------------------------------------------------------------------------------------------------------------------------------------------------------------------------------------------------------|
| <b>Comments</b> | Exact Match or LLM is more specific and descriptive = 1 point against each human reviewer<br>LLM misses something but matched partially, 0.5 point against each human reviewer<br>LLM doesn't match at all, 0 point against each huma reviewer<br>Calculate the total points and the percentage based on the points achieved. |
|-----------------|-------------------------------------------------------------------------------------------------------------------------------------------------------------------------------------------------------------------------------------------------------------------------------------------------------------------------------|

|                      | 38078915 |      |      |      | 38075286 |       |      |      | 38075207 |       |      |      | 38096217 |       |      |      | 38092379 |        |      |      | 38075373 |     |      |     | 38075658 |      |      |      | 38062209 |        |      |      | 38075652 |        |      |      | 38075668 |        |      |      |     |     |      |      |   |   |   |   |
|----------------------|----------|------|------|------|----------|-------|------|------|----------|-------|------|------|----------|-------|------|------|----------|--------|------|------|----------|-----|------|-----|----------|------|------|------|----------|--------|------|------|----------|--------|------|------|----------|--------|------|------|-----|-----|------|------|---|---|---|---|
|                      | F1       | P    | R=C  | H    | F1       | P     | R=C  | H    | F1       | P     | R=C  | H    | F1       | P     | R=C  | H    | F1       | P      | R=C  | H    | F1       | P   | R=C  | H   | F1       | P    | R=C  | H    | F1       | P      | R=C  | H    | F1       | P      | R=C  | H    | F1       | P      | R=C  | H    |     |     |      |      |   |   |   |   |
| Natural Hazards      | 0.67     | 1    | 0.5  | 0    | 1        | 1     | 1    | 0    | 1        | 1     | 1    | 0    | 1        | 1     | 1    | 0    | 1        | 1      | 1    | 0    | 1        | 1   | 1    | 0   | 1        | 1    | 1    | 0    | 1        | 1      | 1    | 0    | 1        | 1      | 1    | 0    | 1        | 1      | 1    | 0    | 1   | 1   | 1    | 0    | 1 | 1 | 1 | 0 |
| Urban Problem        | 0.7      | 0.89 | 0.57 | 0.11 | 0.5      | 0.6   | 0.43 | 0.4  | 0.61     | 0.78  | 0.5  | 0.22 | 0.52     | 0.86  | 0.38 | 0.14 | 0.55     | 0.75   | 0.43 | 0.25 | 0.43     | 0.6 | 0.33 | 0.4 | 0.36     | 0.8  | 0.24 | 0.2  | 0.71     | 0.83   | 0.62 | 0.17 | 0.43     | 0.5    | 0.38 | 0.5  | 0.5      | 0.5    | 0.6  | 0.43 | 0.4 | 0.4 | 0.56 | 0.17 |   |   |   |   |
| Ad. Measures         | 0.8      | 0.8  | 0.8  | 0.2  | 0.55     | 0.6   | 0.5  | 0.4  | 0.88     | 1     | 0.79 | 0    | 0.62     | 0.5   | 0.83 | 0.5  | 0.75     | 1      | 0.6  | 0    | 0.33     | 1   | 0.2  | 0   | 0.5      | 0.5  | 0.5  | 0.5  | 0.85     | 1      | 0.73 | 0    | 0.5      | 0.67   | 0.4  | 0.33 | 0.67     | 0.83   | 0.56 | 0.17 |     |     |      |      |   |   |   |   |
| Ad. Challenges       | 0.53     | 0.71 | 0.42 | 0.29 | 0.5      | 0.5   | 0.5  | 0.5  | 0.76     | 1     | 0.61 | 0    | 0.56     | 0.7   | 0.47 | 0.3  | 0.59     | 0.56   | 0.62 | 0.44 | 0.76     | 1   | 0.62 | 0   | 0.45     | 0.62 | 0.36 | 0.38 | 0.67     | 1      | 0.5  | 0    | 0.55     | 0.86   | 0.4  | 0.14 | 0.75     | 1      | 0.6  | 0    |     |     |      |      |   |   |   |   |
| Total/ average score | 0.89     | 0.85 | 0.51 | 0.18 | 0.8      | 0.675 | 0.61 | 0.33 | 0.77     | 0.945 | 0.72 | 0.06 | 0.72     | 0.765 | 0.67 | 0.23 | 0.82     | 0.8275 | 0.66 | 0.17 | 0.79     | 0.9 | 0.54 | 0.1 | 0.86     | 0.73 | 0.53 | 0.27 | 0.85     | 0.9575 | 0.71 | 0.04 | 0.87     | 0.7575 | 0.54 | 0.24 | 0.83     | 0.8575 | 0.65 | 0.14 |     |     |      |      |   |   |   |   |

|                             | F1   | P      | R=C   | H     |
|-----------------------------|------|--------|-------|-------|
| Average scores of 10 papers | 0.82 | 0.8265 | 0.614 | 0.176 |
|                             | ~82% | ~83%   | ~61%  | ~18%  |

| average         | F1    | P     | R=C   | H     | scores of all papers |
|-----------------|-------|-------|-------|-------|----------------------|
| Natural Hazards | 0.967 | 1     | 0.95  | 0     |                      |
| Urban Problem   | 0.531 | 0.721 | 0.431 | 0.279 |                      |
| Ad. Measures    | 0.645 | 0.79  | 0.591 | 0.21  |                      |
| Ad. Challenges  | 0.612 | 0.795 | 0.51  | 0.205 |                      |
